# Supplementary material for: Studying a novel AIE coating and its handling process via fluorescence spectrum
Source: Royal Society of Chemistry journal article supplement (doi:10.1039/c7ra06527b), 2017-01-01
Supplement: c7ra06527b1.pdf [file c7ra06527b1.pdf]

*Supporting Information for*

**Preparation a novel AIE coating and studying its property via  
fluorescence spectrum**

Weili Li<sup>a\*</sup>, Wei Yao<sup>a</sup>, Jun Wang<sup>a</sup>, Zhenyu Qiu<sup>a</sup>, Jijun Tang<sup>a</sup>, Shengyuan Yang<sup>b</sup>,  
Meifang Zhu<sup>b\*</sup>, Zexiao Xu<sup>c</sup>, Rong Hu<sup>d</sup>, Ben Zhong Tang<sup>d,e\*</sup>

<sup>a</sup> School of Material Science and Engineering, Jiangsu University of Science and Technology, Zhenjiang  
212003, China

<sup>b</sup> State Key Laboratory for Modification of Chemical Fibers and Polymer Materials, Donghua  
University, Shanghai, 201620, China

<sup>c</sup> Suzhou Jiren Hi-Tech Material Co., Ltd, Suzhou 215143, China

<sup>d</sup> Guangdong Innovative Research Team, State Key Laboratory of Luminescent Materials and Devices,  
South China University of Technology, Guangzhou 510640, China

<sup>e</sup> Department of Chemistry, Hong Kong Branch of Chinese National Engineering Research Center for  
Tissue Restoration and Reconstruction, The Hong Kong University of Science & Technology, Clear  
Water Bay, Kowloon, Hong Kong, China

# Contents

**Fig.1S.** <sup>1</sup>H NMR spectra of (a) epoxy resin (E-44); (b) TPE-EPOXY-1

**Fig.2S** FTIR spectra of TPE-EPOXY-1 resin and the cured TPE-EPOXY-1 coating

**Fig.3S** SEM image of the surface of the cured TPE-EPOXY-1 coating

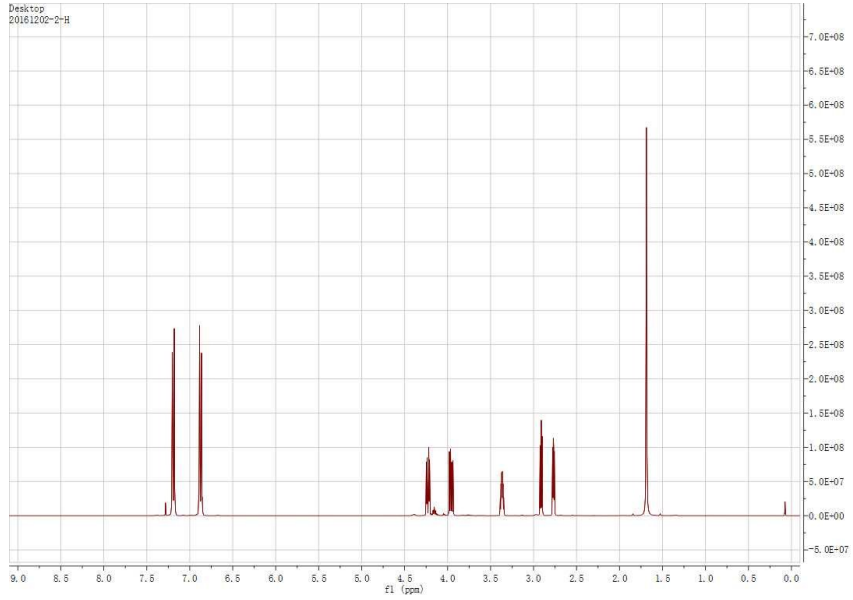

(a)

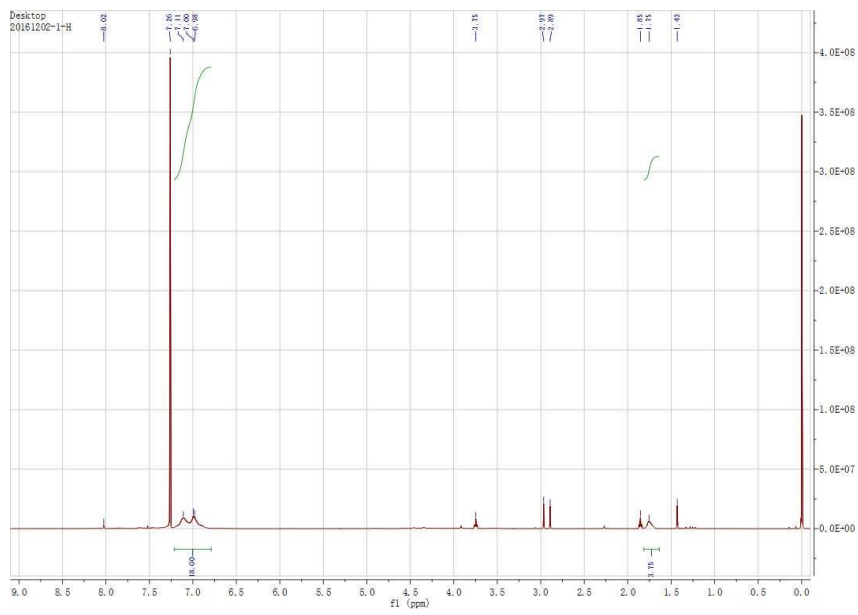

(b)

**Fig.1S.** <sup>1</sup>H NMR spectra of (a) epoxy resin (E-44); (b) TPE-EPOXY-1

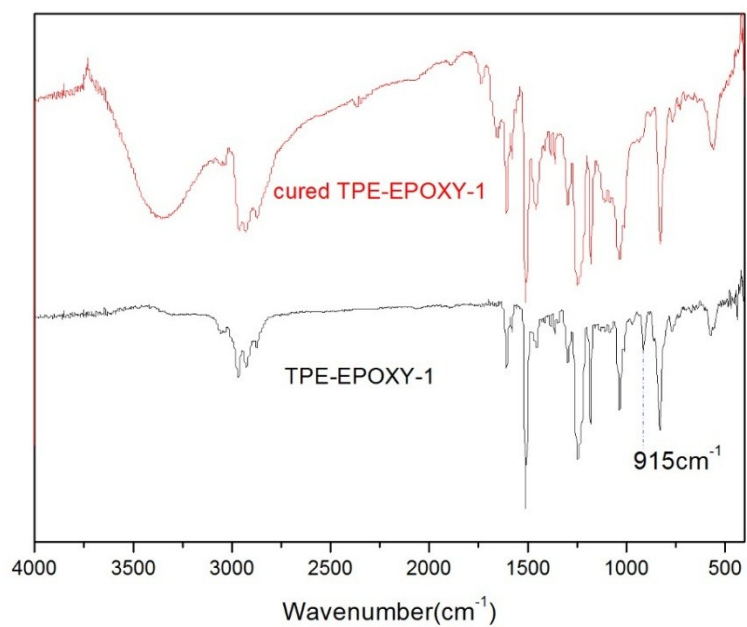

**Fig.2S** FTIR spectra of TPE-EPOXY-1 resin and the cured TPE-EPOXY-1 coating

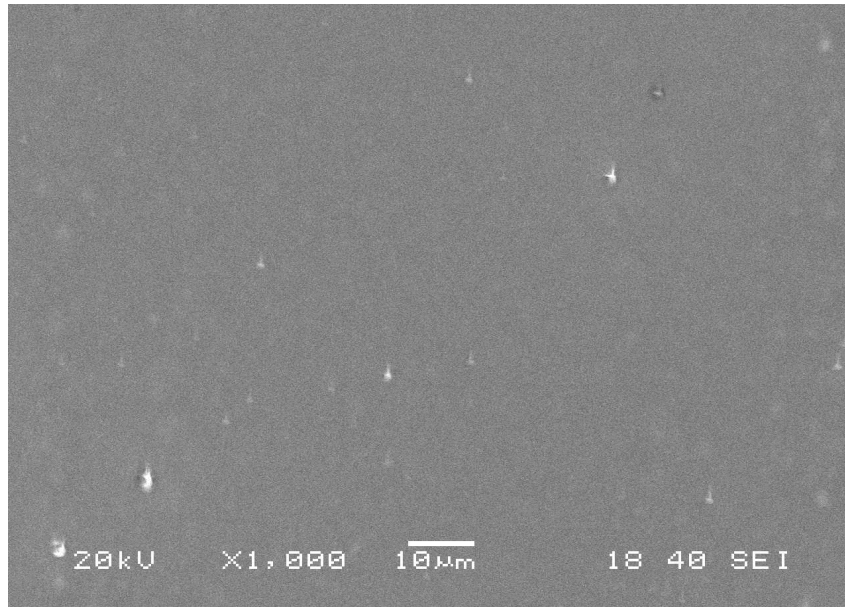

**Fig.3S** SEM image of the surface of the cured TPE-EPOXY-1 coating
